# Supplementary material for: Provider Attitudes and Experience With Measurement-Based Mental Health Care in the VA Implementation Project
Source: Atypon-hosted journal article supplement (doi:10.1176/appi.ps.201800228), 2018-10-30
Supplement: appi.ps.201800228.ds001.pdf [file appi.ps.201800228.ds001.pdf]

Table 2. Sharing of patient reported outcomes with patients and other providers.

|                                                                                                                | N % |       | Provider Type |       |       |       |              |       |               |       | Chi-square<br>(229 df) | p value |
|----------------------------------------------------------------------------------------------------------------|-----|-------|---------------|-------|-------|-------|--------------|-------|---------------|-------|------------------------|---------|
|                                                                                                                |     |       | Psychiatrist  |       | Nurse |       | Psychologist |       | Social worker |       |                        |         |
|                                                                                                                |     |       | N             | %     | N     | %     | N            | %     | N             | %     |                        |         |
| <b>How often do you communicate about patient reported outcomes <u>with the Veteran to explain scores?</u></b> |     |       |               |       |       |       |              |       |               |       |                        |         |
| 0. Never                                                                                                       | 7   | 3.0   | 2             | 7.7   | 3     | 13.0  | 1            | 0.7   | 1             | 2.2   |                        |         |
| 1. Seldom                                                                                                      | 28  | 12.2  | 7             | 26.9  | 4     | 17.4  | 12           | 8.9   | 5             | 10.9  |                        |         |
| 2. About half the time                                                                                         | 29  | 12.6  | 3             | 11.5  | 0     | 0.0   | 21           | 15.6  | 5             | 10.9  |                        |         |
| 3. Usually                                                                                                     | 70  | 30.4  | 9             | 34.6  | 9     | 39.1  | 40           | 29.6  | 12            | 26.1  |                        |         |
| 4. Always                                                                                                      | 96  | 41.7  | 5             | 19.2  | 7     | 30.4  | 61           | 45.2  | 23            | 50.0  |                        |         |
| Total                                                                                                          | 230 | 100.0 | 26            | 100.0 | 23    | 100.0 | 135          | 100.0 | 46            | 100.0 | 28.29                  | 0.005   |

|                                                                                                                                            |     |       |    |       |    |       |     |       |    |       |       |       |
|--------------------------------------------------------------------------------------------------------------------------------------------|-----|-------|----|-------|----|-------|-----|-------|----|-------|-------|-------|
| <b>How often do you communicate about patient reported outcomes <u>with the Veteran in order to accomplish shared decision making?</u></b> |     |       |    |       |    |       |     |       |    |       |       |       |
| 0. Never                                                                                                                                   | 9   | 3.9   | 4  | 15.4  | 3  | 13.0  | 2   | 1.5   | 0  | 0.0   |       |       |
| 1. Seldom                                                                                                                                  | 35  | 15.2  | 5  | 19.2  | 3  | 13.0  | 19  | 14.1  | 8  | 17.4  |       |       |
| 2. About half the time                                                                                                                     | 36  | 15.7  | 4  | 15.4  | 1  | 4.4   | 24  | 17.8  | 7  | 15.2  |       |       |
| 3. Usually                                                                                                                                 | 71  | 30.9  | 10 | 38.5  | 10 | 43.5  | 36  | 26.7  | 15 | 32.6  |       |       |
| 4. Always                                                                                                                                  | 79  | 34.4  | 3  | 11.5  | 6  | 26.1  | 54  | 40.0  | 16 | 34.8  |       |       |
| Total                                                                                                                                      | 230 | 100.0 | 26 | 100.0 | 23 | 100.0 | 135 | 100.0 | 46 | 100.0 | 28.50 | 0.005 |

|                                                                                                                               |     |       |    |       |    |       |     |       |    |       |       |       |
|-------------------------------------------------------------------------------------------------------------------------------|-----|-------|----|-------|----|-------|-----|-------|----|-------|-------|-------|
| <b>How often do you communicate about patient reported outcomes <u>with a Veteran's treatment team or other provider?</u></b> |     |       |    |       |    |       |     |       |    |       |       |       |
| 0. Never                                                                                                                      | 21  | 9.1   | 7  | 26.9  | 4  | 17.4  | 6   | 4.4   | 4  | 8.7   |       |       |
| 1. Seldom                                                                                                                     | 90  | 39.1  | 9  | 34.6  | 7  | 30.4  | 61  | 45.2  | 13 | 28.3  |       |       |
| 2. About half the time                                                                                                        | 33  | 14.4  | 4  | 15.4  | 2  | 8.7   | 19  | 14.1  | 8  | 17.4  |       |       |
| 3. Usually                                                                                                                    | 49  | 21.3  | 4  | 15.4  | 4  | 17.4  | 31  | 23.0  | 10 | 21.7  |       |       |
| 4. Always                                                                                                                     | 37  | 16.1  | 2  | 7.7   | 6  | 26.1  | 18  | 13.3  | 11 | 23.9  |       |       |
| Total                                                                                                                         | 230 | 100.0 | 26 | 100.0 | 23 | 100.0 | 135 | 100.0 | 46 | 100.0 | 23.79 | 0.022 |
